# Supplementary material for: The Function of Different Subunits of the Molecular Chaperone CCT in the Microsporidium Nosema bombycis: NbCCTζ Interacts with NbCCTα
Source: MDPI journal article supplement (doi:10.3390/jof10030229), 2024-03-20
Supplement: s1 [file s1]

**Table S1.** The summary of the expression pattern and subcellular localization of CCT $\zeta$ , CCT $\delta$  and CCT $\alpha$ .

| Protein                       | the transcriptional level of<br>the CCT subunit in <i>N. bombycis</i> |                         |                      | The intracellular location<br>distribution of CCT subunits |        |
|-------------------------------|-----------------------------------------------------------------------|-------------------------|----------------------|------------------------------------------------------------|--------|
|                               | Infective<br>phase                                                    | Proliferative<br>phases | Sporogonic<br>phases | cytoplasm                                                  | nuclei |
| <b>CCT<math>\zeta</math></b>  | high                                                                  | medium                  | low                  | +                                                          | -      |
| <b>CCT<math>\delta</math></b> | high                                                                  | medium                  | low                  | +                                                          | -      |
| <b>CCT<math>\alpha</math></b> | low                                                                   | medium                  | high                 | +                                                          | +      |
